# Supplementary material for: Instability of metal 1,3-benzodi(thiophosphinoyl)methandiide complexes: formation of hafnium, tin and zirconium complexes of 1,3-benzodi(thiophosphinoyl)thioketone dianionic ligand [1,3-C6H4(PhPS)2CS]2−
Source: Royal Society of Chemistry journal article supplement (doi:10.1039/c5dt01212k), 2015-01-01
Supplement: c5dt01212k1.pdf [file c5dt01212k1.pdf]

**Instability of Metal 1,3-Benzodi(thiophosphinoyl)methandiide Complexes: Formation of Hafnium, Tin and Zirconium Complexes of 1,3-Benzodi(thiophosphinoyl)thioiketone Dianionic Ligand [1,3-C<sub>6</sub>H<sub>4</sub>(PhPS)<sub>2</sub>C(S)<sup>2-</sup>]**

Ya-Xiu Yang, Yongxin Li, Rakesh Ganguly, and Cheuk-Wai So\*

Division of Chemistry and Biological Chemistry, School of Physical and Mathematical Sciences, Nanyang Technological University, 637371 Singapore

Supporting Information

Table of Content

1. **Figure S1.** Molecular structure of **3** with thermal ellipsoids at the 50% probability level.
2. **Figure S2.** Molecular structure of **5** with thermal ellipsoids at the 50% probability level.
3. **Table S1.** Crystallographic data of **2, 3, 5, 6, 8**.

1. **Figure S1.** Molecular structure of **3** with thermal ellipsoids at the 50% probability level.

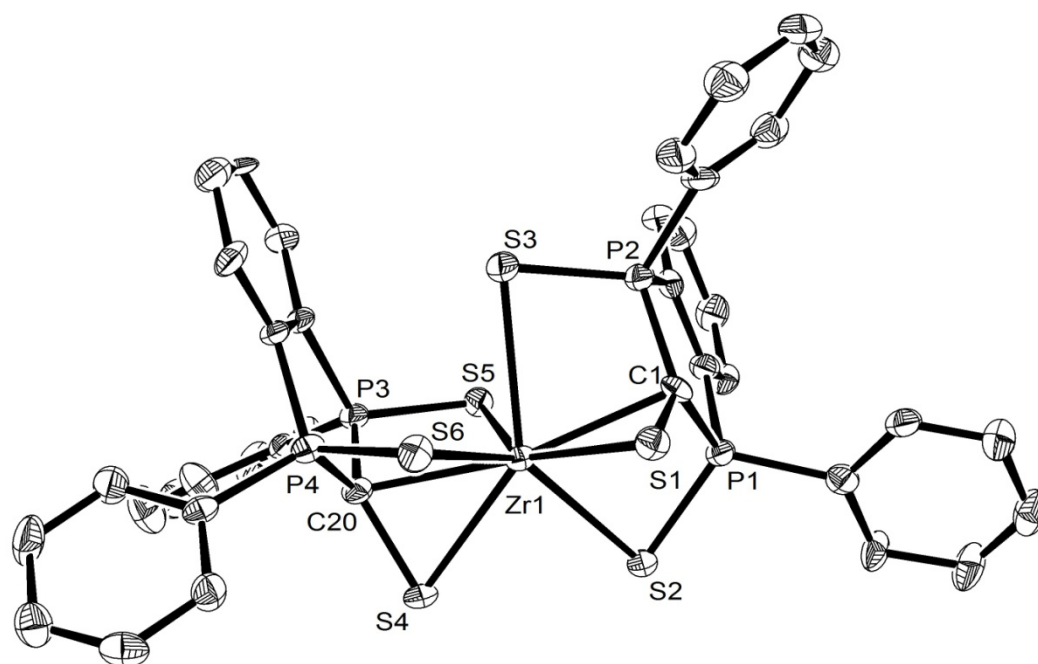

Hydrogen atoms are omitted for clarity. Selected bond lengths (Å) and angles (deg): Zr1-C1 2.431(5), Zr1-C20 2.446(5), Zr1-S1 2.526(2), Zr1-S2 2.722(2), Zr1-S3 2.741(2), Zr1-S4 2.511(2), Zr1-S5 2.810(2), Zr1-S6 2.690(2), C1-P1 1.748(5), C1-P2 1.740(5), P1-S2 1.9947(19), P2-S3 2.001(2), C20-P3 1.740(5), C20-P4 1.742(5), P3-S5 1.997(2), P4-S6 1.995(2), C1-S1 1.753(5), C20-S4 1.771(5), P2-C1-P1 115.0(3), C1-P1-S2 106.79(18), P1-S2-Zr1 81.24(6), C1-P2-S3 107.18(18), P2-S3-Zr1 80.39(6), C1-S1-Zr1 66.44(17), S1-C1-Zr1 72.19(17), S1-Zr1-C1 41.37(12).

2. **Figure S2.** Molecular structure of **5** with thermal ellipsoids at the 50% probability level.

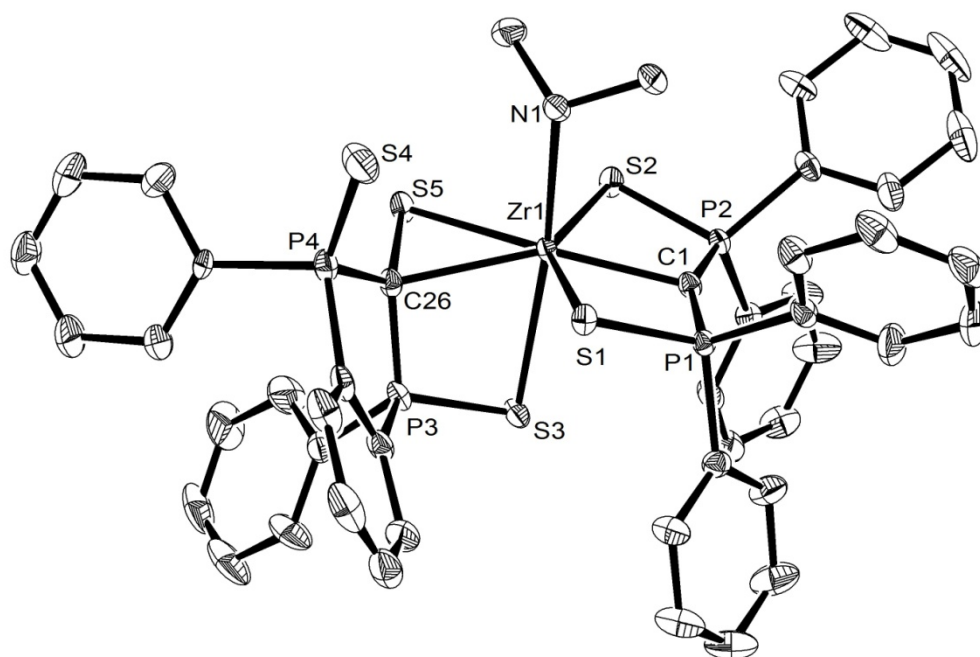

Hydrogen atoms and solvent molecules are omitted for clarity. Selected bond lengths (Å) and angles (deg): Zr1-N1 2.3766(13), Zr1-C1 2.2243(15), Zr1-C26 2.4126(15), Zr1-S1 2.6280(4), Zr1-S2 2.6151(4), Zr1-S3 2.7133(4), Zr1-S5 2.5275(4), C1-P1 1.6718(14), C1-P2 1.6639(15), C26-P3 1.7551(16), C26-P4 1.7715(15), C26-S5 1.7690(15), C26-Zr1-S5 41.89(3), Zr1-S5-C26 65.58(5), S5-C26-Zr1 72.54(5), P3-C26-P4 110.82(8), P3-C26-Zr1 96.46(7), P4-C26-Zr1 124.12(7), P1-C1-P2 156.25(10), P1-C1-Zr1 100.98(7), P2-C1-Zr1 102.77(7), C1-P1-S1 104.05(6), C1-P2-S2 102.76(5), C1-Zr1-S1 73.82(4), C1-Zr1-S2 73.27(4), C26-Zr1-N1 99.78(5), C1-Zr1-N1 99.10(5).

3. Table S1. Crystallographic data of 2, 3, 5, 6 and 8.

|                                                      | 2                                                                 | 3                                                                 | 5                                                                 | 6                                                                 | 8                                                                                |
|------------------------------------------------------|-------------------------------------------------------------------|-------------------------------------------------------------------|-------------------------------------------------------------------|-------------------------------------------------------------------|----------------------------------------------------------------------------------|
| formula                                              | C <sub>38</sub> H <sub>28</sub> HfP <sub>4</sub> S <sub>6</sub>   | C <sub>38</sub> H <sub>28</sub> P <sub>4</sub> S <sub>6</sub> Zr  | C <sub>53</sub> H <sub>49</sub> HfNP <sub>4</sub> S <sub>5</sub>  | C <sub>53</sub> H <sub>49</sub> NP <sub>4</sub> S <sub>5</sub> Zr | C <sub>40</sub> H <sub>32</sub> Cl <sub>4</sub> P <sub>4</sub> S <sub>6</sub> Sn |
| formula weight                                       | 979.33                                                            | 892.06                                                            | 1162.60                                                           | 1075.33                                                           | 1089.38                                                                          |
| color                                                | yellow                                                            | yellow                                                            | yellow                                                            | yellow                                                            | red                                                                              |
| crystal system                                       | Monoclinic                                                        | Monoclinic                                                        | Triclinic                                                         | Triclinic                                                         | Monoclinic                                                                       |
| space group                                          | <i>P</i> 2(1)/ <i>c</i>                                           | <i>P</i> 2(1)/ <i>c</i>                                           | <i>P</i> -1                                                       | <i>P</i> -1                                                       | <i>P</i> 2(1)/ <i>n</i>                                                          |
| <i>a</i> / Å                                         | 12.6474(2)                                                        | 12.6708(13)                                                       | 10.2767(4)                                                        | 10.2451(2)                                                        | 11.9643(5)                                                                       |
| <i>b</i> / Å                                         | 20.4070(3)                                                        | 20.4641(17)                                                       | 14.8249(6)                                                        | 14.8428(3)                                                        | 12.8350(6)                                                                       |
| <i>c</i> / Å                                         | 15.6269(2)                                                        | 15.6111(15)                                                       | 16.7593(7)                                                        | 16.7675(3)                                                        | 14.6553(5)                                                                       |
| <i>α</i> / deg                                       | 90                                                                | 90                                                                | 82.255(3)                                                         | 82.3140(10)                                                       | 90                                                                               |
| <i>β</i> / deg                                       | 113.0550(10)                                                      | 112.891(6)                                                        | 85.970(2)                                                         | 86.1890(10)                                                       | 90.804(2)                                                                        |
| <i>γ</i> / deg                                       | 90                                                                | 90                                                                | 86.652(2)                                                         | 86.6900(10)                                                       | 90                                                                               |
| <i>V</i> / Å <sup>3</sup>                            | 3711.09(9)                                                        | 3729.1(6)                                                         | 2520.66(18)                                                       | 2518.19(8)                                                        | 2250.27(16)                                                                      |
| <i>Z</i>                                             | 4                                                                 | 4                                                                 | 2                                                                 | 2                                                                 | 2                                                                                |
| <i>d</i> <sub>calcd</sub> / mg cm <sup>-3</sup>      | 1.753                                                             | 1.589                                                             | 1.532                                                             | 1.418                                                             | 1.608                                                                            |
| <i>μ</i> / mm <sup>-1</sup>                          | 3.351                                                             | 0.832                                                             | 2.441                                                             | 0.590                                                             | 1.256                                                                            |
| <i>F</i> (000)                                       | 1936                                                              | 1808                                                              | 1172                                                              | 1108                                                              | 1092                                                                             |
| crystal size / mm <sup>3</sup>                       | 0.20 x 0.16 x 0.10                                                | 0.04 x 0.02 x 0.02                                                | 0.30 x 0.14 x 0.10                                                | 0.40 x 0.40 x 0.30                                                | 0.18 x 0.20 x 0.22                                                               |
| Index ranges                                         | -18 ≤ <i>h</i> ≤ 18<br>-29 ≤ <i>k</i> ≤ 28<br>-22 ≤ <i>l</i> ≤ 22 | -17 ≤ <i>h</i> ≤ 17<br>-28 ≤ <i>k</i> ≤ 23<br>-19 ≤ <i>l</i> ≤ 21 | -14 ≤ <i>h</i> ≤ 11<br>-20 ≤ <i>k</i> ≤ 20<br>-23 ≤ <i>l</i> ≤ 23 | -16 ≤ <i>h</i> ≤ 17<br>-23 ≤ <i>k</i> ≤ 24<br>-28 ≤ <i>l</i> ≤ 24 | -14 ≤ <i>h</i> ≤ 14<br>-16 ≤ <i>k</i> ≤ 16<br>-18 ≤ <i>l</i> ≤ 13                |
| no. of rflns collected                               | 81778                                                             | 39502                                                             | 55479                                                             | 52967                                                             | 24725                                                                            |
| <i>R</i> 1, <i>wR</i> 2 ( <i>I</i> > 2σ( <i>I</i> )) | 0.0210, 0.0485                                                    | 0.0663, 0.0953                                                    | 0.0587, 0.1029                                                    | 0.0430, 0.0943                                                    | 0.0290, 0.0659                                                                   |
| <i>R</i> 1, <i>wR</i> 2 (all data)                   | 0.0238, 0.0497                                                    | 0.1904, 0.1281                                                    | 0.1054, 0.1200                                                    | 0.0644, 0.1044                                                    | 0.0363, 0.0698                                                                   |
| goodness of fit., <i>F</i> <sup>2</sup>              | 1.131                                                             | 0.938                                                             | 1.027                                                             | 1.014                                                             | 1.037                                                                            |
| no. of data / restraints / params                    | 11921/0/442                                                       | 10454/0/442                                                       | 14359/824/705                                                     | 23545/1174/759                                                    | 4602/238/307                                                                     |
| largest diff peak, hole / eÅ <sup>-3</sup>           | 1.472, -0.953                                                     | 0.749, -0.724                                                     | 1.856, -2.115                                                     | 0.791, -0.749                                                     | 0.543, -0.365                                                                    |
